# Supplementary material
Source: Springer Nature journal article supplement (https://www.springermedizin.de/resource/supplementary/12985_2007_266_MOESM3_ESM.pdf/9607666)

Day 21

Day 150

*control*

400 bp —

200 bp —

100 bp —

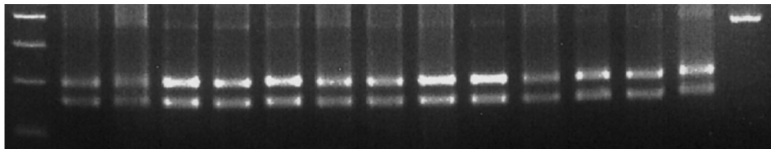

Supplement: MOESM3 [file 9607666]
